# Supplementary material for: Topological semimetal porous carbon as a high-performance anode for Li-ion batteries
Source: Royal Society of Chemistry journal article supplement (doi:10.1039/c9ta03587g), 2019-01-01
Supplement: c9ta03587g1.pdf [file c9ta03587g1.pdf]

**Supporting Information for**  
**Topological semimetal porous carbon as a high-performance anode for Li-ion battery**

Huanhuan Xie<sup>a</sup>, Yu Qie<sup>a</sup>, Imran Muhammad<sup>a</sup> and Qiang Sun<sup>a,b,\*</sup>

<sup>a</sup>Department of Materials Science and Engineering, College of Engineering, Peking University, Beijing 100871, China

<sup>b</sup>Center for Applied Physics and Technology, Peking University, Beijing 100871, China

\*Corresponding Author: [sunqiang@pku.edu.cn](mailto:sunqiang@pku.edu.cn) (Qiang Sun)

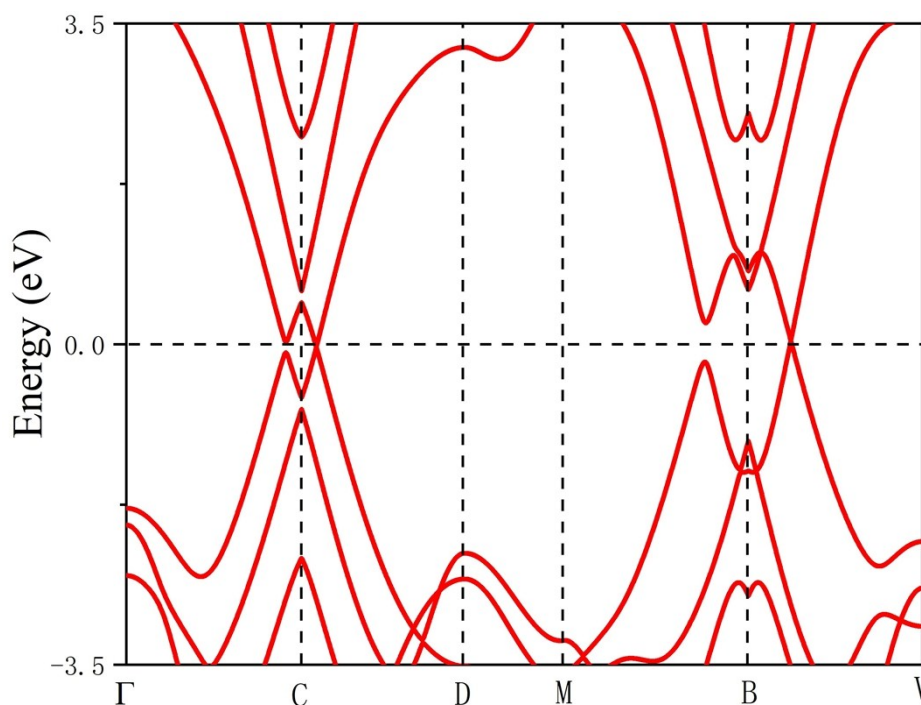

Figure S1: Calculated energy band structures along the high-symmetry points.

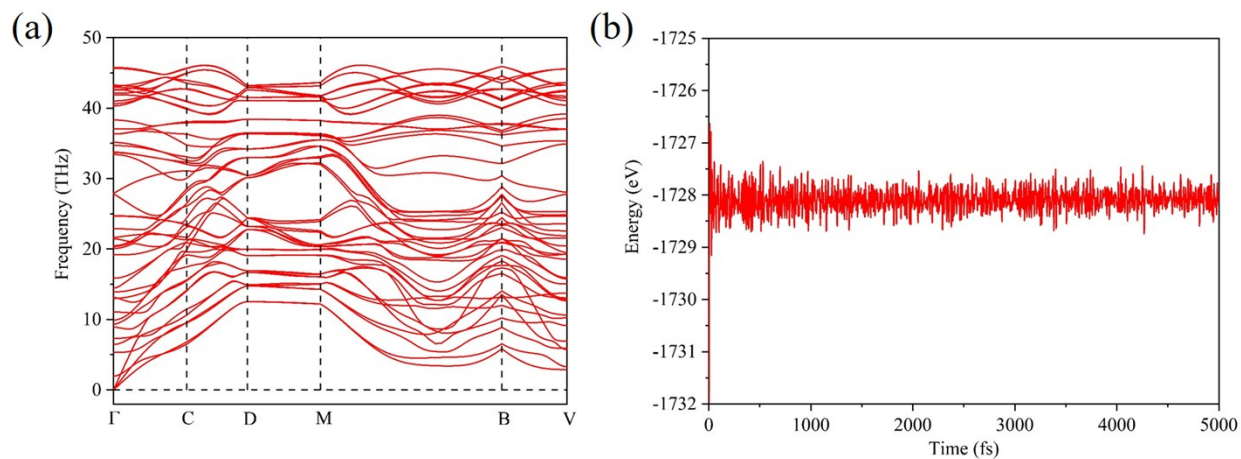

Figure S2: (a) Phonon spectra and (b) energy fluctuation during AIMD simulation at 300 K.

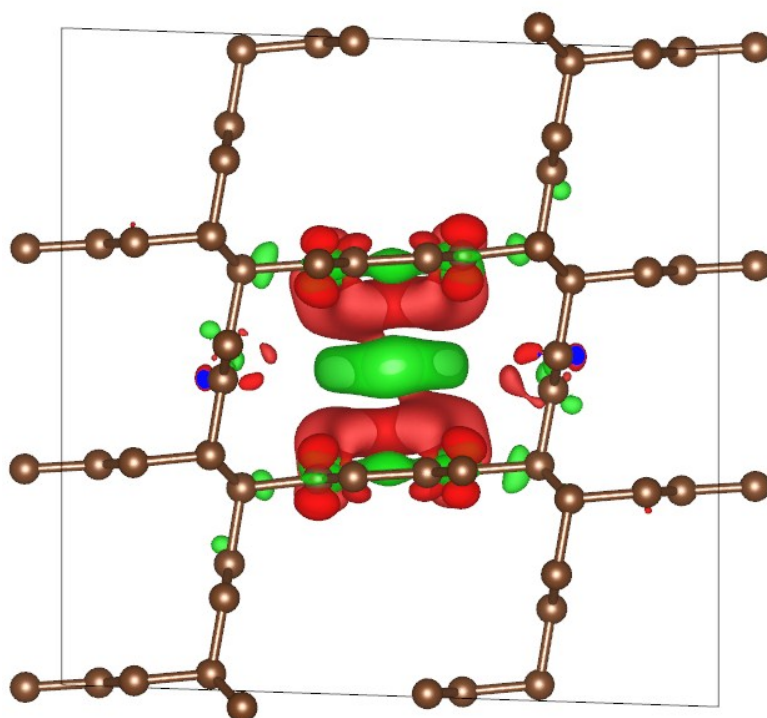

Figure S3: Charge density difference between the Li atom and the adsorbed system with an isosurface value of 0.004 e/Bohr<sup>3</sup>. The red and blue are for charge gain and loss, respectively.

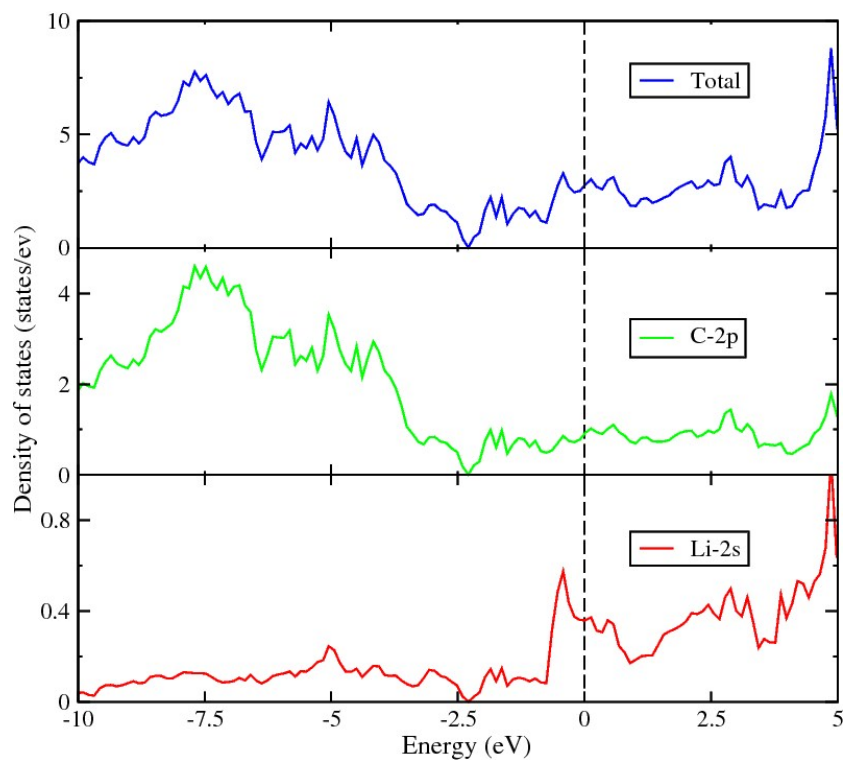

Figure S4: Total DOS and PDOS of the fully Li-intercalated  $m\text{-C}_{16}$

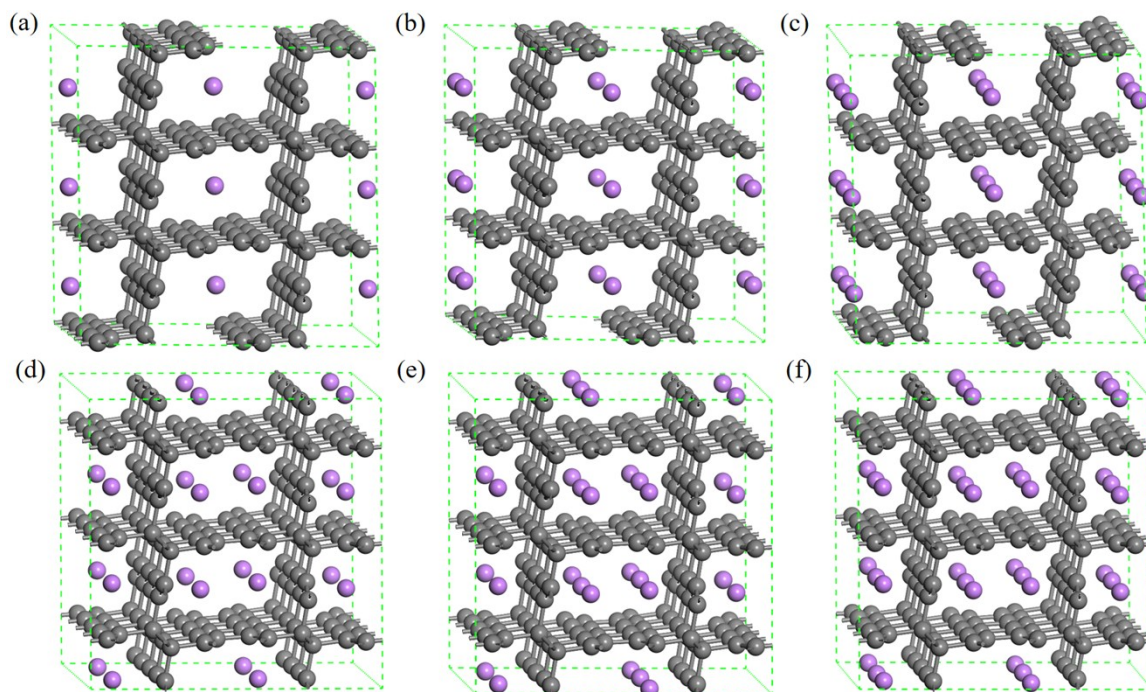

Figure S5: Side views of the six stable intermediate phases for the Li concentrations of (a) 0.125, (b) 0.25, (c) 0.375, (d) 0.5, (e) 0.625 and (f) 0.75.

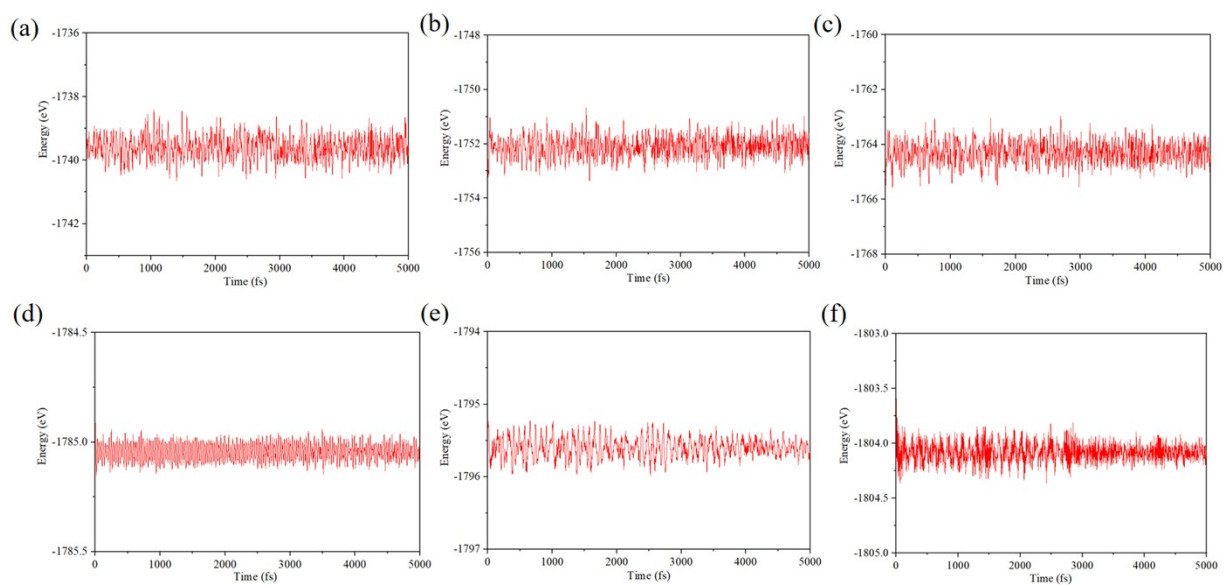

Figure S6: Energy fluctuation during AIMD simulation at 300 K of the six stable intermediate phases for the Li concentrations of (a) 0.125, (b) 0.25, (c) 0.375, (d) 0.5, (e) 0.625 and (f) 0.75.
